# Supplementary material for: Genomic Surveillance of Clinical Pseudomonas aeruginosa Isolates Reveals an Additive Effect of Carbapenemase Production on Carbapenem Resistance
Source: PubMed Central journal article supplement (PMC9241860; doi:10.1128/spectrum.00766-22), 2022-05-31
Supplement: reviewer-comments.pdf [file reviewer-comments.pdf]

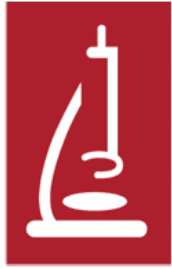

AMERICAN  
SOCIETY FOR  
MICROBIOLOGY

# Microbiology Spectrum

## Genomic surveillance of clinical *Pseudomonas aeruginosa* isolates reveals an additive effect of carbapenemase production on carbapenem resistance.

Luke Diorio-Toth, Sidra Irum, Robert Potter, Meghan Wallace, Muhammad Arslan, Tehmina Munir, Saadia Andleeb, Carey-Ann Burnham, and Gautam Dantas

*Corresponding Author(s): Luke Diorio-Toth, Washington University in St. Louis, School of Medicine*

---

### Review Timeline:

Submission Date:

April 14, 2022

Accepted:

May 1, 2022

---

*Editor: Daria Van Tyne*

*Reviewer(s): The reviewers have opted to remain anonymous.*

### Transaction Report:

(Note: With the exception of the correction of typographical or spelling errors that could be a source of ambiguity, letters and reports are not edited. The original formatting of letters and referee reports may not be reflected in this compilation.)

**DOI:** <https://doi.org/10.1128/spectrum.00766-22>

May 1, 2022

Dr. Luke Diorio-Toth  
Washington University in St. Louis, School of Medicine  
Edison Family Center for Genome Sciences and Systems Biology  
4515 McKinley Avenue  
5th Floor, Room 5121  
St. Louis, MO 63110

Re: Spectrum00766-22 (Genomic surveillance of clinical *Pseudomonas aeruginosa* isolates reveals an additive effect of carbapenemase production on carbapenem resistance.)

Dear Dr. Luke Diorio-Toth:

Your manuscript has been accepted, and I am forwarding it to the ASM Journals Department for publication. You will be notified when your proofs are ready to be viewed.

The ASM Journals program strives for constant improvement in our submission and publication process. Please tell us how we can improve your experience by taking this quick [Author Survey](#).

As an open-access publication, Spectrum receives no financial support from paid subscriptions and depends on authors' prompt payment of publication fees as soon as their articles are accepted. You will be contacted separately about payment when the proofs are issued; please follow the instructions in that e-mail. Arrangements for payment must be made before your article is published. For a complete list of **Publication Fees**, including supplemental material costs, please visit our [website](#).

ASM policy requires that data be available to the public upon online posting of the article, so please verify all links to sequence records, if present, and make sure that each number retrieves the full record of the data. If a new accession number is not linked or a link is broken, provide production staff with the correct URL for the record. If the accession numbers for new data are not publicly accessible before the expected online posting of the article, publication of your article may be delayed; please contact the ASM production staff immediately with the expected release date.

Corresponding authors may [join or renew ASM membership](#) to obtain discounts on publication fees. Need to upgrade your membership level? Please contact Customer Service at [Service@asmusa.org](mailto:Service@asmusa.org).

Thank you for submitting your paper to Spectrum.

Sincerely,

Daria Van Tyne  
Editor, Microbiology Spectrum

Journals Department  
American Society for Microbiology  
1752 N St., NW  
Washington, DC 20036  
E-mail: [spectrum@asmusa.org](mailto:spectrum@asmusa.org)

Supplemental Tables: Accept  
Supplemental Figure S2: Accept  
Supplemental Figure S1: Accept  
Supplemental Figure S6: Accept  
Supplemental Figure S3: Accept  
Supplemental Figure S4: Accept  
Supplemental Figure S5: Accept
