# Supplementary material for: Genomic Surveillance of Clinical Pseudomonas aeruginosa Isolates Reveals an Additive Effect of Carbapenemase Production on Carbapenem Resistance
Source: PubMed Central journal article supplement (PMC9241860; doi:10.1128/spectrum.00766-22), 2022-05-31

**A**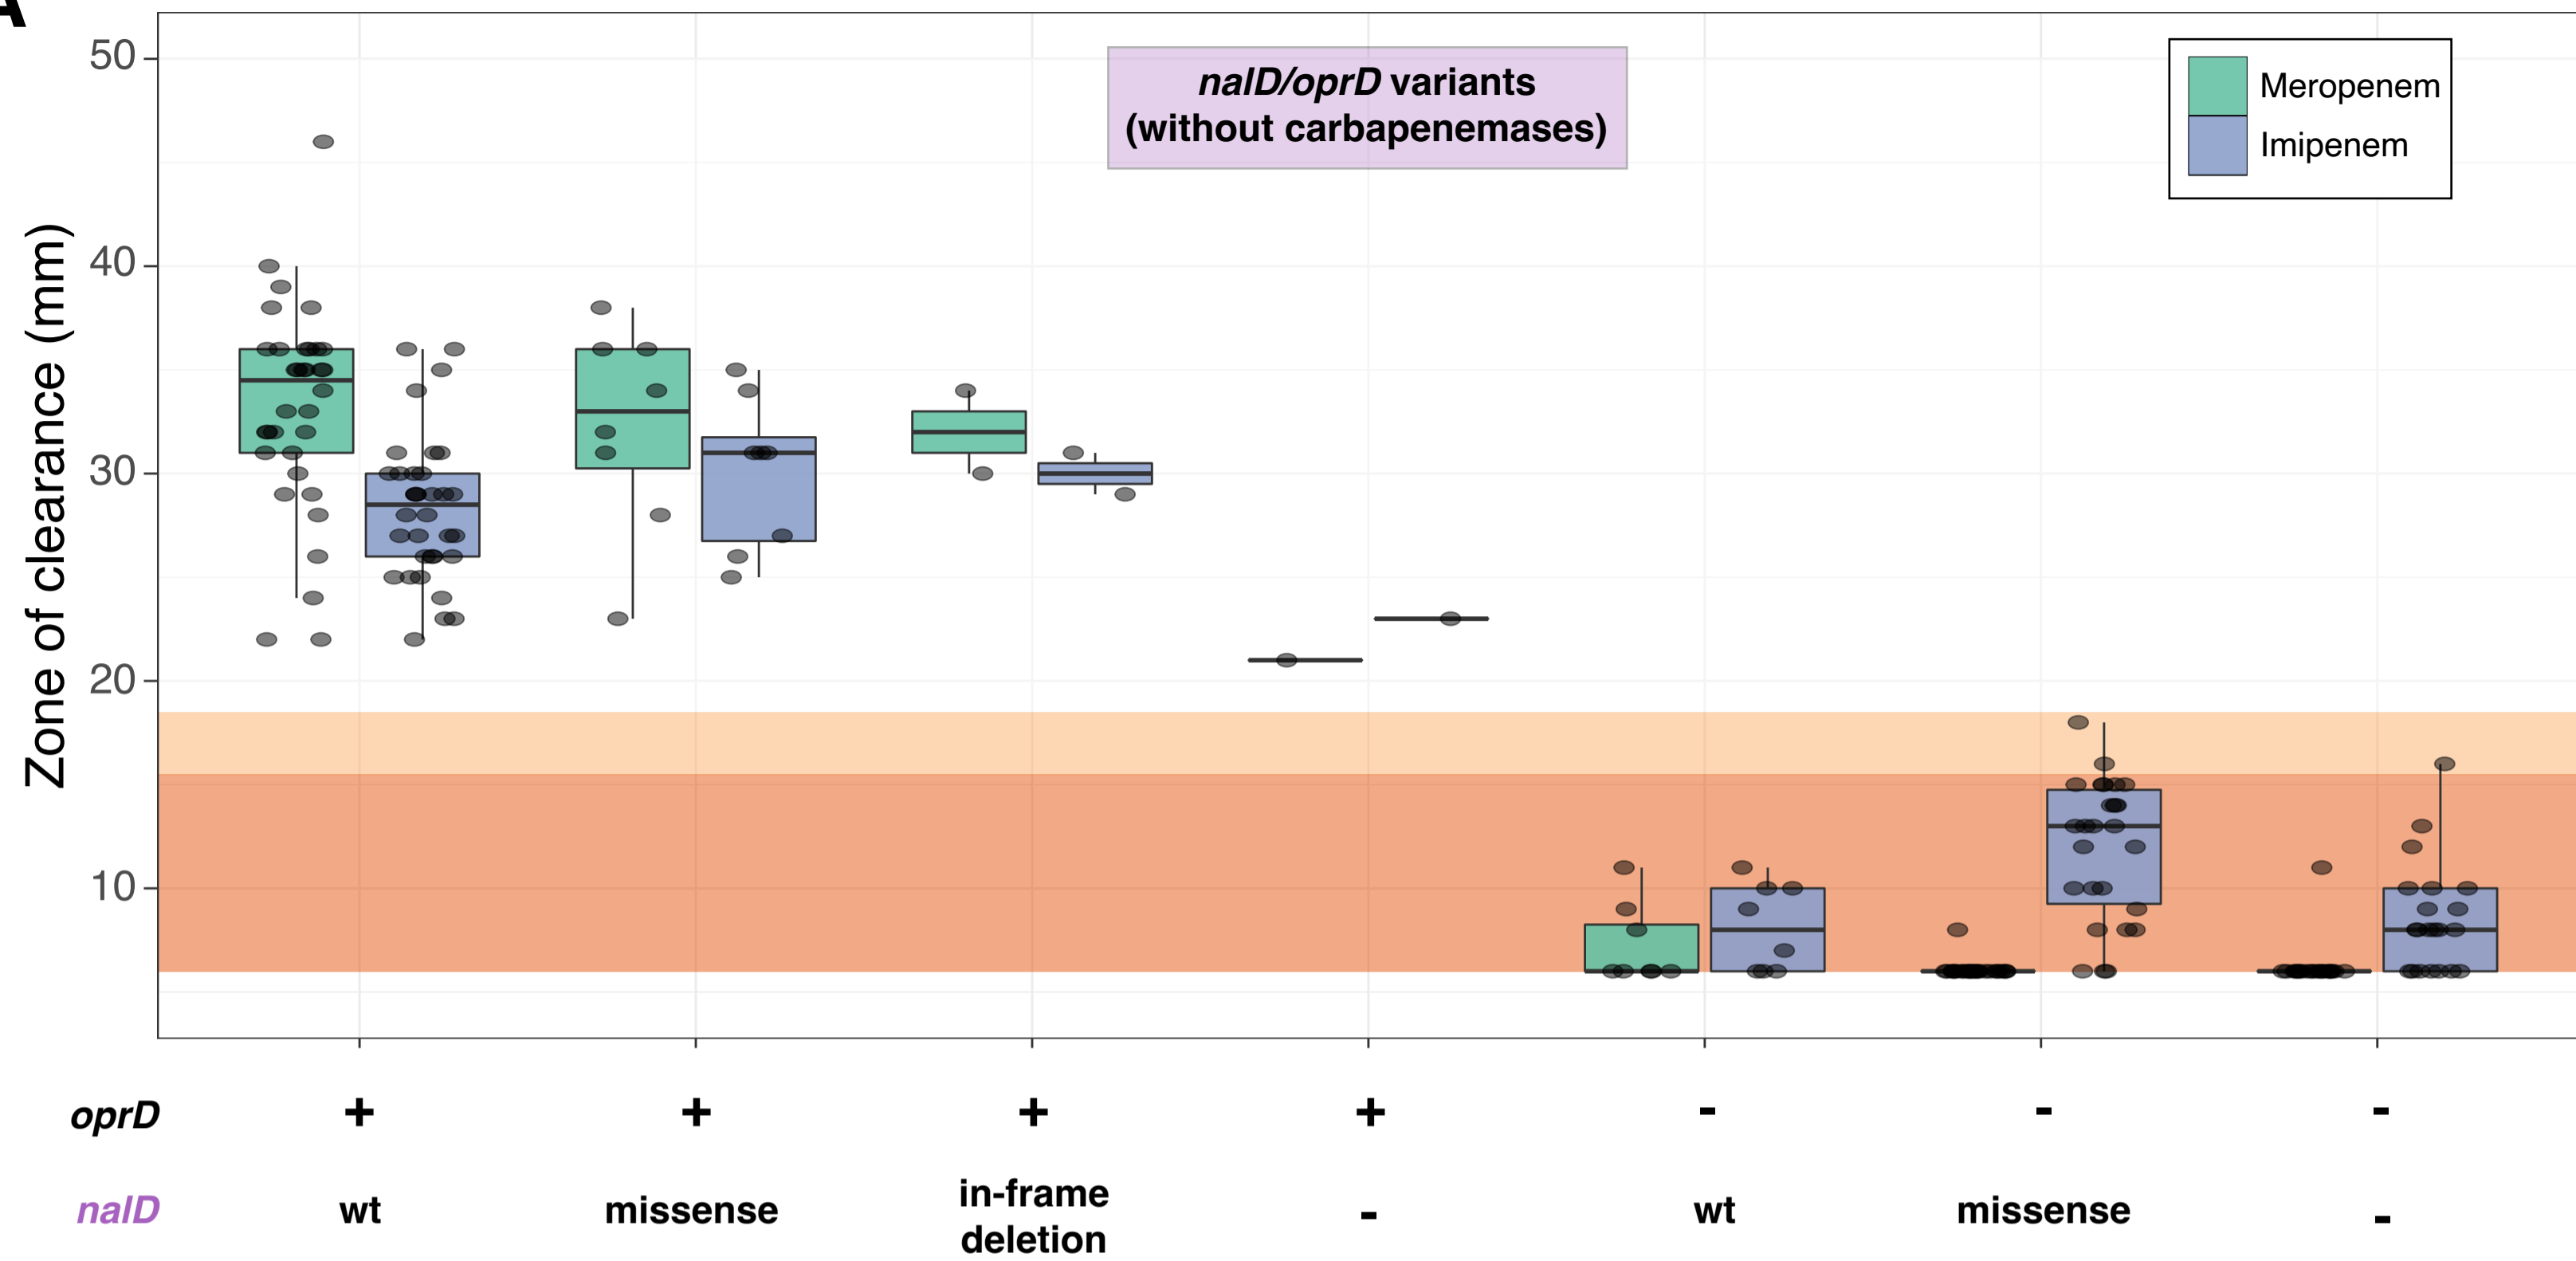**B**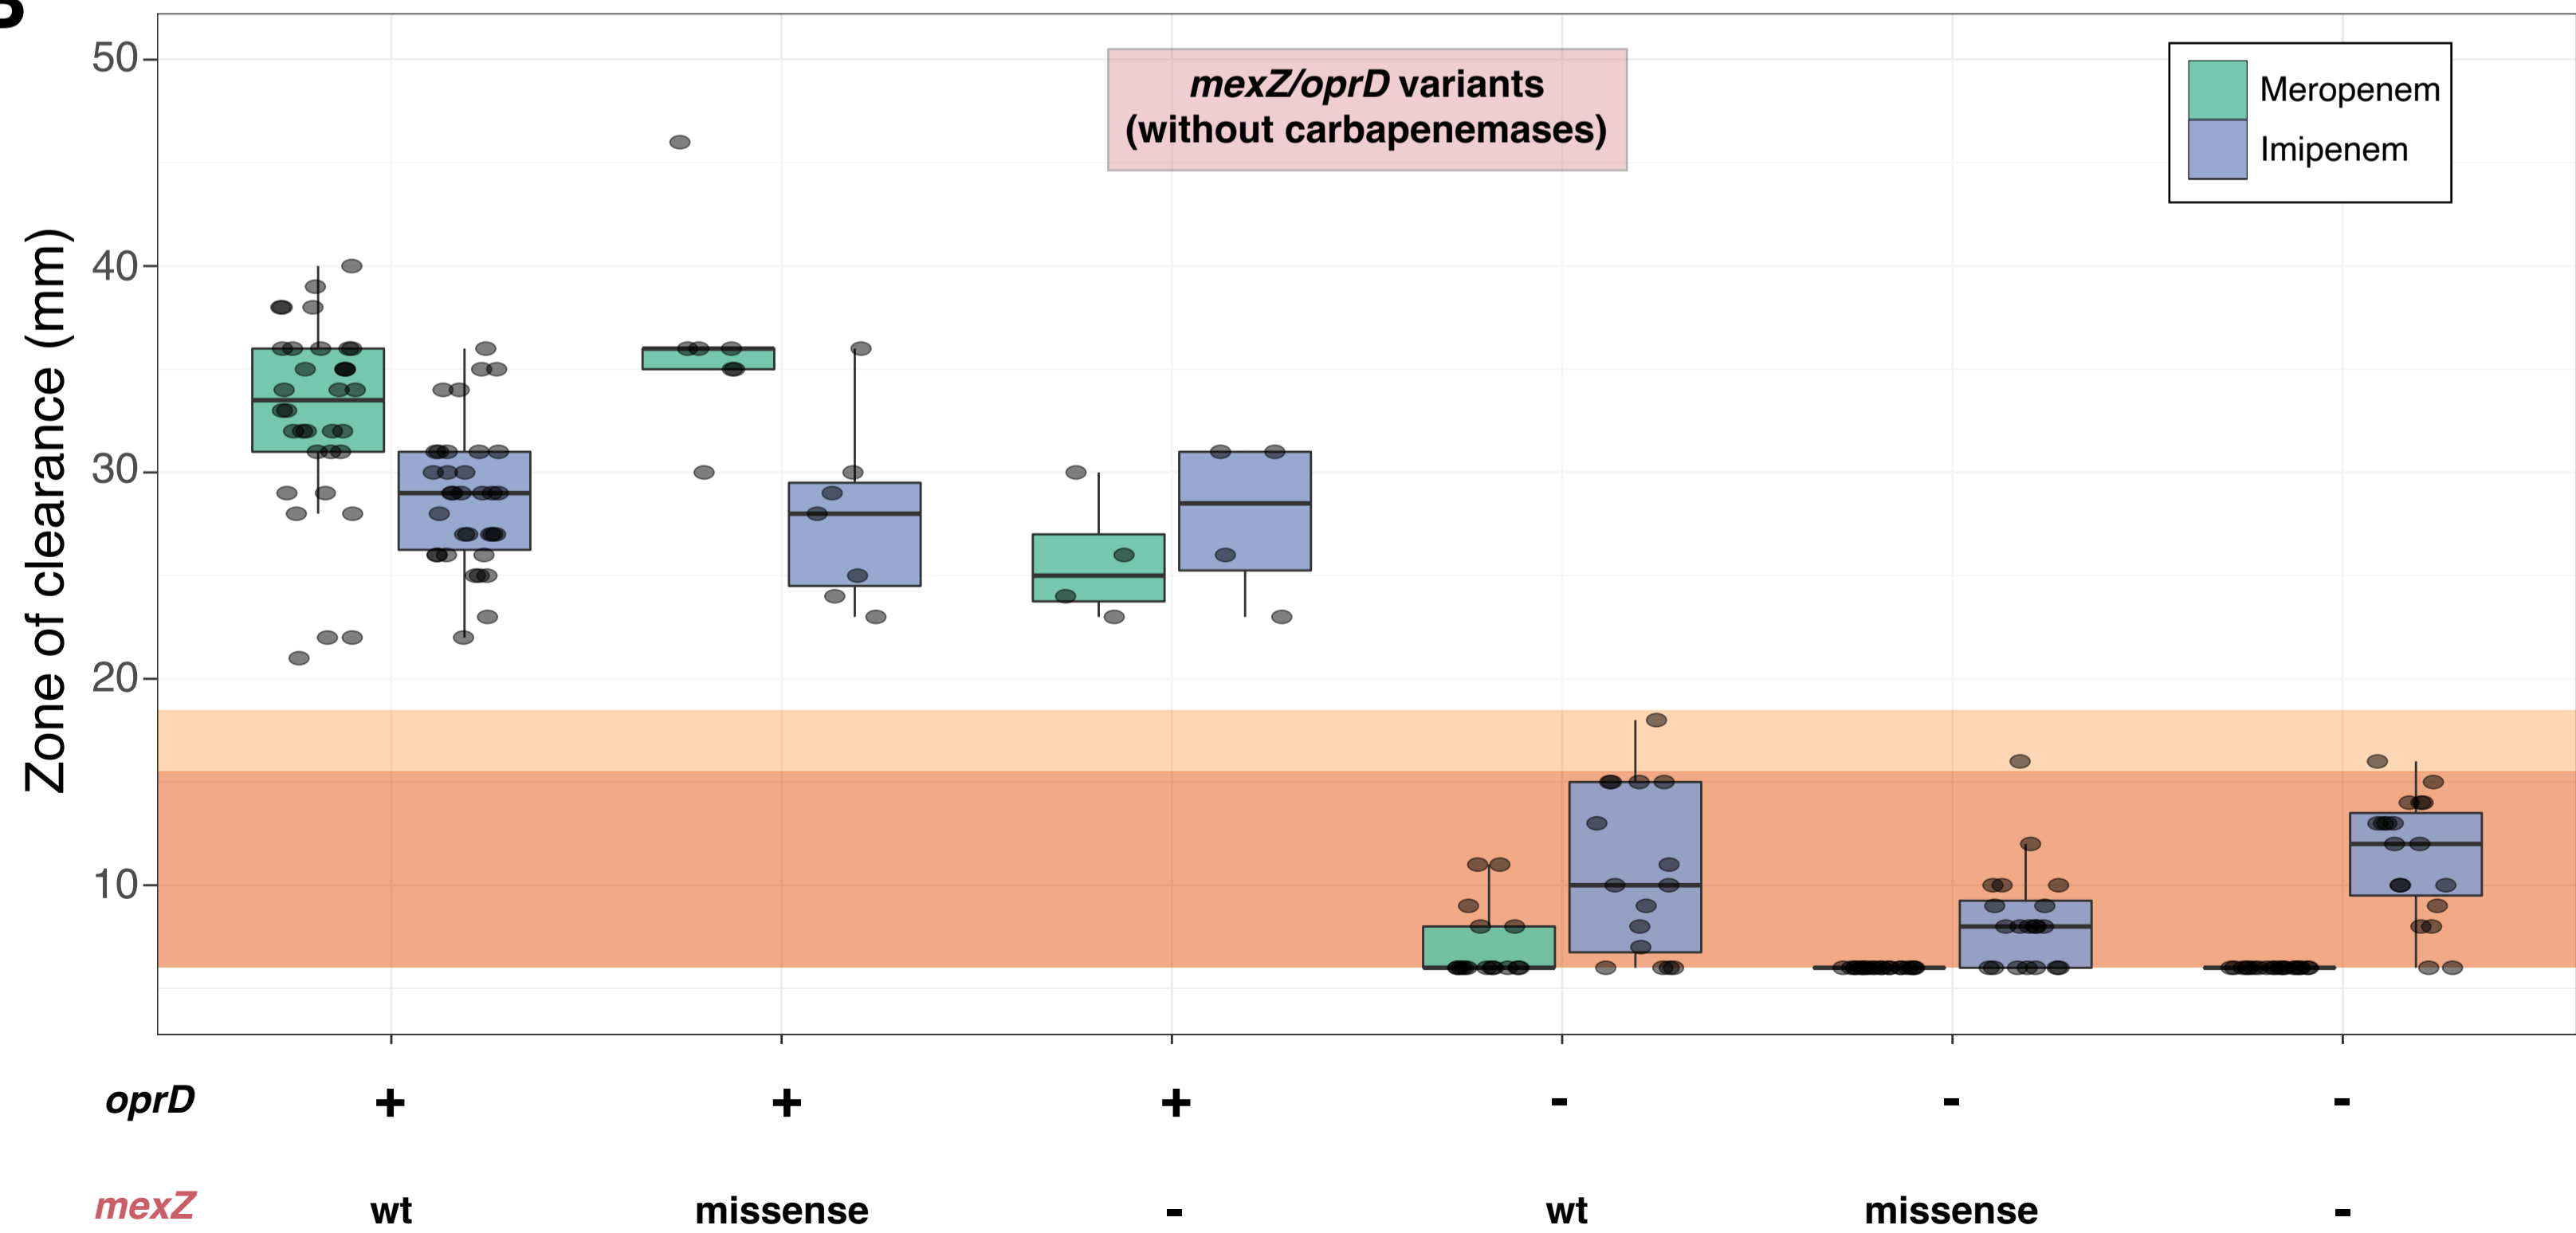

Supplement: spectrum.00766-22-s0005.pdf [file spectrum.00766-22-s0005.pdf]
