# Supplementary material for: Genomic Surveillance of Clinical Pseudomonas aeruginosa Isolates Reveals an Additive Effect of Carbapenemase Production on Carbapenem Resistance
Source: PubMed Central journal article supplement (PMC9241860; doi:10.1128/spectrum.00766-22), 2022-05-31
Supplement: spectrum.00766-22-s0006.pdf [file spectrum.00766-22-s0006.pdf]

PA\_1,  
contig 69

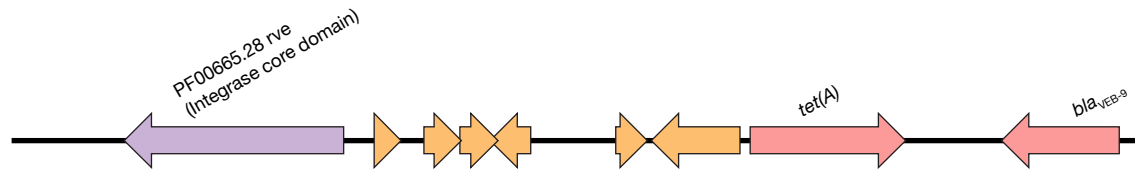

1 Kbp

PA\_116,  
contig 50

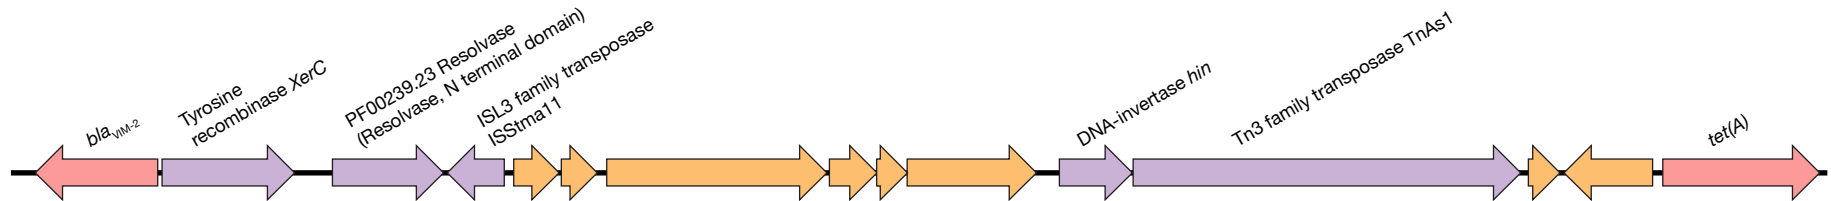

PA\_146,  
contig 234

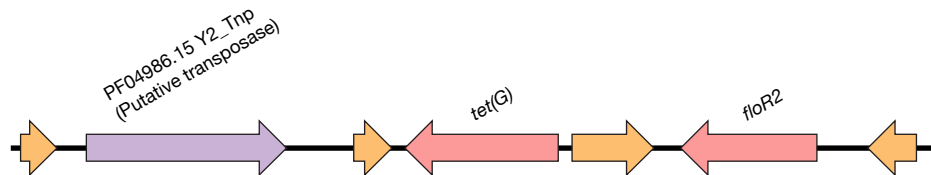

annotation:  ARG  MGE  other
